# Supplementary material for: Underlying Causes of Myocardial Infarction with Nonobstructive Coronary Arteries: Optical Coherence Tomography and Cardiac Magnetic Resonance Imaging Pilot Study
Source: MDPI journal article supplement (doi:10.3390/jcm11247495), 2022-12-17
Supplement: s1 [file s1]

**Supplement 1.** Baseline characteristics.

## Patient 1

|                                |     |
|--------------------------------|-----|
| <b>Age</b>                     | 46  |
| <b>Female</b>                  | No  |
| <b>NSTEMI</b>                  | No  |
| <b>Typical angina</b>          | No  |
| <b>LVEF (%)</b>                | 40  |
| <b>RWMA</b>                    | Yes |
| <b>Severe valvular disease</b> | No  |
| <b>Pericardial effusion</b>    | No  |
| <b>Heart Failure</b>           |     |
| <b>NYHA I</b>                  | No  |
| <b>NYHA II</b>                 | Yes |
| <b>NYHA III</b>                | No  |
| <b>NYHA IV</b>                 | No  |
| <b>Hypertension</b>            | Yes |
| <b>Hypercholesterolaemia</b>   | No  |
| <b>Smoking</b>                 | Yes |
| <b>Diabetes</b>                | No  |
| <b>Obesity</b>                 | No  |
| <b>Previous CAD</b>            | No  |
| <b>Previous stroke</b>         | No  |
| <b>Previous kidney disease</b> | No  |
| <b>Previous lung disease</b>   | No  |
| <b>Family history</b>          | No  |
| <b>Sinus rhythm in ECG</b>     | Yes |

NSTEMI = non-ST segment elevation myocardial infarction. HR = heart rate. LVEF = left ventricle ejection fraction. RWMA = regional wall motion abnormalities, CAD = coronary artery disease, PAD = peripheral artery disease

Patient 2

|                                |     |
|--------------------------------|-----|
| <b>Age</b>                     | 41  |
| <b>Female</b>                  | Yes |
| <b>NSTEMI</b>                  | Yes |
| <b>Typical angina</b>          | Yes |
| <b>LVEF (%)</b>                | 70  |
| <b>RWMA</b>                    | No  |
| <b>Severe valvular disease</b> | No  |
| <b>Pericardial effusion</b>    | No  |
| <b>Heart Failure</b>           |     |
| <b>NYHA I</b>                  | Yes |
| <b>NYHA II</b>                 | No  |
| <b>NYHA III</b>                | No  |
| <b>NYHA IV</b>                 | No  |
| <b>Hypertension</b>            | No  |
| <b>Hypercholesterolaemia</b>   | No  |
| <b>Smoking</b>                 | No  |
| <b>Diabetes</b>                | No  |
| <b>Obesity</b>                 | No  |
| <b>Previous CAD</b>            | No  |
| <b>Previous stroke</b>         | No  |
| <b>Previous kidney disease</b> | No  |
| <b>Previous lung disease</b>   | No  |
| <b>Family history</b>          | No  |
| <b>Sinus rhythm in ECG</b>     | Yes |

NSTEMI = non-ST segment elevation myocardial infarction. HR = heart rate. LVEF = left ventricle ejection fraction. RWMA = regional wall motion abnormalities, CAD = coronary artery disease, PAD = peripheral artery disease

Patient 3

|                                |     |
|--------------------------------|-----|
| <b>Age</b>                     | 55  |
| <b>Female</b>                  | No  |
| <b>NSTEMI</b>                  | No  |
| <b>Typical angina</b>          | Yes |
| <b>LVEF (%)</b>                | 55  |
| <b>RWMA</b>                    | No  |
| <b>Severe valvular disease</b> | No  |
| <b>Pericardial effusion</b>    | No  |
| <b>Heart Failure</b>           |     |
| <b>NYHA I</b>                  | No  |
| <b>NYHA II</b>                 | Yes |
| <b>NYHA III</b>                | No  |
| <b>NYHA IV</b>                 | No  |
| <b>Hypertension</b>            | Yes |
| <b>Hypercholesterolaemia</b>   | No  |
| <b>Smoking</b>                 | No  |
| <b>Diabetes</b>                | No  |
| <b>Obesity</b>                 | No  |
| <b>Previous CAD</b>            | No  |
| <b>Previous stroke</b>         | No  |
| <b>Previous kidney disease</b> | No  |
| <b>Previous lung disease</b>   | No  |
| <b>Family history</b>          | No  |
| <b>Sinus rhythm in ECG</b>     | Yes |

NSTEMI = non-ST segment elevation myocardial infarction. HR = heart rate. LVEF = left ventricle ejection fraction. RWMA = regional wall motion abnormalities, CAD = coronary artery disease, PAD = peripheral artery disease

Patient 4

|                                |     |
|--------------------------------|-----|
| <b>Age</b>                     | 64  |
| <b>Female</b>                  | Yes |
| <b>NSTEMI</b>                  | Yes |
| <b>Typical angina</b>          | Yes |
| <b>LVEF (%)</b>                | 60  |
| <b>RWMA</b>                    | No  |
| <b>Severe valvular disease</b> | No  |
| <b>Pericardial effusion</b>    | Yes |
| <b>Heart Failure</b>           |     |
| <b>NYHA I</b>                  | Yes |
| <b>NYHA II</b>                 | No  |
| <b>NYHA III</b>                | No  |
| <b>NYHA IV</b>                 | No  |
| <b>Hypertension</b>            | Yes |
| <b>Hypercholesterolaemia</b>   | Yes |
| <b>Smoking</b>                 | No  |
| <b>Diabetes</b>                | No  |
| <b>Obesity</b>                 | No  |
| <b>Previous CAD</b>            | No  |
| <b>Previous stroke</b>         | No  |
| <b>Previous kidney disease</b> | No  |
| <b>Previous lung disease</b>   | No  |
| <b>Family history</b>          | Yes |
| <b>Sinus rhythm in ECG</b>     | Yes |

NSTEMI = non-ST segment elevation myocardial infarction. HR = heart rate. LVEF = left ventricle ejection fraction. RWMA = regional wall motion abnormalities, CAD = coronary artery disease, PAD = peripheral artery disease

Patient 5

|                                |     |
|--------------------------------|-----|
| <b>Age</b>                     | 54  |
| <b>Female</b>                  | No  |
| <b>NSTEMI</b>                  | No  |
| <b>Typical angina</b>          | No  |
| <b>LVEF (%)</b>                | 60  |
| <b>RWMA</b>                    | No  |
| <b>Severe valvular disease</b> | No  |
| <b>Pericardial effusion</b>    | No  |
| <b>Heart Failure</b>           |     |
| <b>NYHA I</b>                  | Yes |
| <b>NYHA II</b>                 | No  |
| <b>NYHA III</b>                | No  |
| <b>NYHA IV</b>                 | No  |
| <b>Hypertension</b>            | Yes |
| <b>Hypercholesterolaemia</b>   | No  |
| <b>Smoking</b>                 | Yes |
| <b>Diabetes</b>                | No  |
| <b>Obesity</b>                 | No  |
| <b>Previous CAD</b>            | No  |
| <b>Previous stroke</b>         | No  |
| <b>Previous kidney disease</b> | No  |
| <b>Previous lung disease</b>   | No  |
| <b>Family history</b>          | No  |
| <b>Sinus rhythm in ECG</b>     | Yes |

NSTEMI = non-ST segment elevation myocardial infarction. HR = heart rate. LVEF = left ventricle ejection fraction. RWMA = regional wall motion abnormalities, CAD = coronary artery disease, PAD = peripheral artery disease

Patient 6

|                                |     |
|--------------------------------|-----|
| <b>Age</b>                     | 56  |
| <b>Female</b>                  | Yes |
| <b>NSTEMI</b>                  | Yes |
| <b>Typical angina</b>          | Yes |
| <b>LVEF (%)</b>                | 50  |
| <b>RWMA</b>                    | Yes |
| <b>Severe valvular disease</b> | No  |
| <b>Pericardial effusion</b>    | No  |
| <b>Heart Failure</b>           |     |
| <b>NYHA I</b>                  | Yes |
| <b>NYHA II</b>                 | No  |
| <b>NYHA III</b>                | No  |
| <b>NYHA IV</b>                 | No  |
| <b>Hypertension</b>            | No  |
| <b>Hypercholesterolaemia</b>   | No  |
| <b>Smoking</b>                 | Yes |
| <b>Diabetes</b>                | No  |
| <b>Obesity</b>                 | No  |
| <b>Previous CAD</b>            | No  |
| <b>Previous stroke</b>         | No  |
| <b>Previous kidney disease</b> | No  |
| <b>Previous lung disease</b>   | No  |
| <b>Family history</b>          | No  |
| <b>Sinus rhythm in ECG</b>     | Yes |

NSTEMI = non-ST segment elevation myocardial infarction. HR = heart rate. LVEF = left ventricle ejection fraction. RWMA = regional wall motion abnormalities, CAD = coronary artery disease, PAD = peripheral artery disease

Patient 7

|                                |     |
|--------------------------------|-----|
| <b>Age</b>                     | 49  |
| <b>Female</b>                  | No  |
| <b>NSTEMI</b>                  | Yes |
| <b>Typical angina</b>          | Yes |
| <b>LVEF</b>                    | 30  |
| <b>RWMA</b>                    | Yes |
| <b>Severe valvular disease</b> | No  |
| <b>Pericardial effusion</b>    | No  |
| <b>Heart Failure</b>           |     |
| <b>NYHA I</b>                  | No  |
| <b>NYHA II</b>                 | Yes |
| <b>NYHA III</b>                | No  |
| <b>NYHA IV</b>                 | No  |
| <b>Hypertension</b>            | Yes |
| <b>Hypercholesterolaemia</b>   | No  |
| <b>Smoking</b>                 | Yes |
| <b>Diabetes</b>                | No  |
| <b>Obesity</b>                 | No  |
| <b>Previous CAD</b>            | No  |
| <b>Previous stroke</b>         | No  |
| <b>Previous kidney disease</b> | No  |
| <b>Previous lung disease</b>   | No  |
| <b>Family history</b>          | No  |
| <b>Sinus rhythm in ECG</b>     | Yes |

NSTEMI = non-ST segment elevation myocardial infarction. HR = heart rate. LVEF = left ventricle ejection fraction. RWMA = regional wall motion abnormalities, CAD = coronary artery disease, PAD = peripheral artery disease

Patient 8

|                                |     |
|--------------------------------|-----|
| <b>Age</b>                     | 49  |
| <b>Female</b>                  | No  |
| <b>NSTEMI</b>                  | Yes |
| <b>Typical angina</b>          | No  |
| <b>LVEF (%)</b>                | 55  |
| <b>RWMA</b>                    | No  |
| <b>Severe valvular disease</b> | No  |
| <b>Pericardial effusion</b>    | No  |
| <b>Heart Failure</b>           |     |
| <b>NYHA I</b>                  | Yes |
| <b>NYHA II</b>                 | No  |
| <b>NYHA III</b>                | No  |
| <b>NYHA IV</b>                 | No  |
| <b>Hypertension</b>            | Yes |
| <b>Hypercholesterolaemia</b>   | No  |
| <b>Smoking</b>                 | Yes |
| <b>Diabetes</b>                | No  |
| <b>Obesity</b>                 | Yes |
| <b>Previous CAD</b>            | No  |
| <b>Previous stroke</b>         | No  |
| <b>Previous kidney disease</b> | No  |
| <b>Previous lung disease</b>   | No  |
| <b>Family history</b>          | Yes |
| <b>Sinus rhythm in ECG</b>     | Yes |

NSTEMI = non-ST segment elevation myocardial infarction. HR = heart rate. LVEF = left ventricle ejection fraction. RWMA = regional wall motion abnormalities, CAD = coronary artery disease, PAD = peripheral artery disease



Patient 9

|                                |     |
|--------------------------------|-----|
| <b>Age</b>                     | 52  |
| <b>Female</b>                  | Yes |
| <b>NSTEMI</b>                  | Yes |
| <b>Typical angina</b>          | Yes |
| <b>LVEF (%)</b>                | 30  |
| <b>RWMA</b>                    | Yes |
| <b>Severe valvular disease</b> | No  |
| <b>Pericardial effusion</b>    | No  |
| <b>Heart Failure</b>           |     |
| <b>NYHA I</b>                  | No  |
| <b>NYHA II</b>                 | Yes |
| <b>NYHA III</b>                | No  |
| <b>NYHA IV</b>                 | No  |
| <b>Hypertension</b>            | Yes |
| <b>Hypercholesterolaemia</b>   | No  |
| <b>Smoking</b>                 | Yes |
| <b>Diabetes</b>                | No  |
| <b>Obesity</b>                 | No  |
| <b>Previous CAD</b>            | No  |
| <b>Previous stroke</b>         | No  |
| <b>Previous kidney disease</b> | No  |
| <b>Previous lung disease</b>   | No  |
| <b>Family history</b>          | Yes |
| <b>Sinus rhythm in ECG</b>     | Yes |

NSTEMI = non-ST segment elevation myocardial infarction. HR = heart rate. LVEF = left ventricle ejection fraction. RWMA = regional wall motion abnormalities, CAD = coronary artery disease, PAD = peripheral artery disease

Patient 10

|                                |     |
|--------------------------------|-----|
| <b>Age</b>                     | 55  |
| <b>Female</b>                  | Yes |
| <b>NSTEMI</b>                  | Yes |
| <b>Typical angina</b>          | Yes |
| <b>LVEF (%)</b>                | 60  |
| <b>RWMA</b>                    | No  |
| <b>Severe valvular disease</b> | No  |
| <b>Pericardial effusion</b>    | No  |
| <b>Heart Failure</b>           |     |
| <b>NYHA I</b>                  | Yes |
| <b>NYHA II</b>                 | No  |
| <b>NYHA III</b>                | No  |
| <b>NYHA IV</b>                 | No  |
| <b>Hypertension</b>            | Yes |
| <b>Hypercholesterolaemia</b>   | Yes |
| <b>Smoking</b>                 | Yes |
| <b>Diabetes</b>                | Yes |
| <b>Obesity</b>                 | No  |
| <b>Previous CAD</b>            | No  |
| <b>Previous stroke</b>         | No  |
| <b>Previous kidney disease</b> | No  |
| <b>Previous lung disease</b>   | No  |
| <b>Family history</b>          | No  |
| <b>Sinus rhythm in ECG</b>     | Yes |

NSTEMI = non-ST segment elevation myocardial infarction. HR = heart rate. LVEF = left ventricle ejection fraction. RWMA = regional wall motion abnormalities, CAD = coronary artery disease, PAD = peripheral artery disease

**Supplement 2. OCT and CMR findings.**

Patient 1

| <b>OCT</b>                                    |     |
|-----------------------------------------------|-----|
| <b>Plaque rupture</b>                         | No  |
| <b>Plaque erosion</b>                         | No  |
| <b>Eruptive calcific nodule</b>               | No  |
| <b>Spontaneous coronary artery dissection</b> | No  |
| <b>Presence of thrombus</b>                   | No  |
| <b>Negative OCT</b>                           | Yes |
| <b>CMR</b>                                    |     |
| <b>T2 hyperintensity</b>                      |     |
| <b>Present</b>                                | Yes |
| <b>Absent</b>                                 | No  |
| <b>Myocardial hemorrhage</b>                  | No  |
| <b>MVO</b>                                    | No  |
| <b>Abnormal delayed enhancement</b>           |     |
| <b>Subendocardial</b>                         | No  |
| <b>Transmural</b>                             | Yes |
| <b>Subendocardial + transmural</b>            | No  |
| <b>LV dimensions and function</b>             |     |
| <b>LVEDV (ml/m<sup>2</sup>)</b>               | 171 |
| <b>LVESV (ml/m<sup>2</sup>)</b>               | 80  |
| <b>LVEF (%)</b>                               | 53  |
| <b>Pericardial effusion</b>                   | No  |
| <b>Definite diagnosis</b>                     |     |
| <b>MI</b>                                     | No  |
| <b>Myocarditis</b>                            | Yes |
| <b>Negative CMR</b>                           | No  |

OCT – optical coherence tomography, CMR – cardiac magnetic resonance, MVO – microvascular obstruction, LV – left ventricle, MI – myocardial infarction.

Patient 2

| OCT                                    |     |
|----------------------------------------|-----|
| Plaque rupture                         | Yes |
| Plaque erosion                         | No  |
| Eruptive calcific nodule               | No  |
| Spontaneous coronary artery dissection | Yes |
| Presence of thrombus                   | No  |
| Negative OCT                           | No  |
| CMR                                    |     |
| T2 hyperintensity                      |     |
| Present                                | Yes |
| Absent                                 | No  |
| Myocardial hemorrhage                  | No  |
| MVO                                    | No  |
| Abnormal delayed enhancement           |     |
| Subendocardial                         | Yes |
| Transmural                             | No  |
| Subendocardial + transmural            | No  |
| LV dimensions and function             |     |
| LVEDV (ml/m <sup>2</sup> )             | 105 |
| LVESV (ml/m <sup>2</sup> )             | 42  |
| LVEF (%)                               | 60  |
| Pericardial effusion                   | No  |
| Definite diagnosis                     |     |
| MI                                     | Yes |
| Myocarditis                            | No  |
| Negative CMR                           | No  |

OCT – optical coherence tomography, CMR – cardiac magnetic resonance, MVO – microvascular obstruction, LV – left ventricle, MI – myocardial infarction.

Patient 3

| OCT                                    |     |
|----------------------------------------|-----|
| Plaque rupture                         | No  |
| Plaque erosion                         | Yes |
| Eruptive calcific nodule               | No  |
| Spontaneous coronary artery dissection | No  |
| Presence of thrombus                   | Yes |
| Negative OCT                           | No  |
| CMR                                    |     |
| T2 hyperintensity                      |     |
| Present                                | Yes |
| Absent                                 | No  |
| Myocardial hemorrhage                  | No  |
| MVO                                    | No  |
| Abnormal delayed enhancement           |     |
| Subendocardial                         | Yes |
| Transmural                             | Yes |
| Subendocardial + transmural            | Yes |
| LV dimensions and function             |     |
| LVEDV (ml/m <sup>2</sup> )             | 127 |
| LVESV (ml/m <sup>2</sup> )             | 28  |
| LVEF (%)                               | 78  |
| Pericardial effusion                   | No  |
| Definite diagnosis                     |     |
| MI                                     | Yes |
| Myocarditis                            | No  |
| Negative CMR                           | No  |

OCT – optical coherence tomography, CMR – cardiac magnetic resonance, MVO – microvascular obstruction, LV – left ventricle, MI – myocardial infarction.

Patient 4

| OCT                                    |     |
|----------------------------------------|-----|
| Plaque rupture                         | No  |
| Plaque erosion                         | Yes |
| Eruptive calcific nodule               | No  |
| Spontaneous coronary artery dissection | No  |
| Presence of thrombus                   | No  |
| Negative OCT                           | No  |
| CMR                                    |     |
| T2 hyperintensity                      |     |
| Present                                | Yes |
| Absent                                 | No  |
| Myocardial hemorrhage                  | No  |
| MVO                                    | No  |
| Abnormal delayed enhancement           |     |
| Subendocardial                         | Yes |
| Transmural                             | Yes |
| Subendocardial + transmural            | Yes |
| LV dimensions and function             |     |
| LVEDV (ml/m <sup>2</sup> )             | 94  |
| LVESV (ml/m <sup>2</sup> )             | 33  |
| LVEF (%)                               | 65  |
| Pericardial effusion                   | Yes |
| Definite diagnosis                     |     |
| MI                                     | Yes |
| Myocarditis                            | No  |
| Negative CMR                           | No  |

OCT – optical coherence tomography, CMR – cardiac magnetic resonance, MVO – microvascular obstruction, LV – left ventricle, MI – myocardial infarction.

Patient 5

| OCT                                    |     |
|----------------------------------------|-----|
| Plaque rupture                         | No  |
| Plaque erosion                         | No  |
| Eruptive calcific nodule               | No  |
| Spontaneous coronary artery dissection | No  |
| Presence of thrombus                   | Yes |
| Negative OCT                           | No  |
| CMR                                    |     |
| T2 hyperintensity                      |     |
| Present                                | Yes |
| Absent                                 | No  |
| Myocardial hemorrhage                  | No  |
| MVO                                    | No  |
| Abnormal delayed enhancement           |     |
| Subendocardial                         | Yes |
| Transmural                             | Yes |
| Subendocardial + transmural            | Yes |
| LV dimensions and function             |     |
| LVEDV (ml/m <sup>2</sup> )             | 138 |
| LVESV (ml/m <sup>2</sup> )             | 45  |
| LVEF (%)                               | 68  |
| Pericardial effusion                   | No  |
| Definite diagnosis                     |     |
| MI                                     | Yes |
| Myocarditis                            | No  |
| Negative CMR                           | No  |

OCT – optical coherence tomography, CMR – cardiac magnetic resonance, MVO – microvascular obstruction, LV – left ventricle, MI – myocardial infarction.

Patient 6

| OCT                                    |     |
|----------------------------------------|-----|
| Plaque rupture                         | No  |
| Plaque erosion                         | No  |
| Eruptive calcific nodule               | No  |
| Spontaneous coronary artery dissection | No  |
| Presence of thrombus                   | No  |
| Negative OCT                           | Yes |
| CMR                                    |     |
| T2 hyperintensity                      |     |
| Present                                | Yes |
| Absent                                 | No  |
| Myocardial hemorrhage                  | No  |
| MVO                                    | No  |
| Abnormal delayed enhancement           |     |
| Subendocardial                         | No  |
| Transmural                             | Yes |
| Subendocardial + transmural            | No  |
| LV dimensions and function             |     |
| LVEDV (ml/m <sup>2</sup> )             | 100 |
| LVESV (ml/m <sup>2</sup> )             | 41  |
| LVEF (%)                               | 59  |
| Pericardial effusion                   | No  |
| Definite diagnosis                     |     |
| MI                                     | No  |
| Myocarditis                            | Yes |
| Negative CMR                           | No  |

OCT – optical coherence tomography, CMR – cardiac magnetic resonance, MVO – microvascular obstruction, LV – left ventricle, MI – myocardial infarction.



Patient 7

| <b>OCT</b>                                    |     |
|-----------------------------------------------|-----|
| <b>Plaque rupture</b>                         | No  |
| <b>Plaque erosion</b>                         | No  |
| <b>Eruptive calcific nodule</b>               | No  |
| <b>Spontaneous coronary artery dissection</b> | Yes |
| <b>Presence of thrombus</b>                   | No  |
| <b>Negative OCT</b>                           | No  |
| <b>CMR</b>                                    |     |
| <b>T2 hyperintensity</b>                      |     |
| <b>Present</b>                                | No  |
| <b>Absent</b>                                 | Yes |
| <b>Myocardial hemorrhage</b>                  | No  |
| <b>MVO</b>                                    | No  |
| <b>Abnormal delayed enhancement</b>           |     |
| <b>Subendocardial</b>                         | No  |
| <b>Transmural</b>                             | No  |
| <b>Subendocardial + transmural</b>            | No  |
| <b>LV dimensions and function</b>             |     |
| <b>LVEDV (ml/m<sup>2</sup>)</b>               | 131 |
| <b>LVESV (ml/m<sup>2</sup>)</b>               | 63  |
| <b>LVEF (%)</b>                               | 52  |
| <b>Pericardial effusion</b>                   | No  |
| <b>Definite diagnosis</b>                     |     |
| <b>MI</b>                                     | Yes |
| <b>Myocarditis</b>                            | No  |
| <b>Negative CMR</b>                           | No  |

OCT – optical coherence tomography, CMR – cardiac magnetic resonance, MVO – microvascular obstruction, LV – left ventricle, MI – myocardial infarction.

Patient 8

| OCT                                    |     |
|----------------------------------------|-----|
| Plaque rupture                         | Yes |
| Plaque erosion                         | No  |
| Eruptive calcific nodule               | No  |
| Spontaneous coronary artery dissection | No  |
| Presence of thrombus                   | No  |
| Negative OCT                           | No  |
| CMR                                    |     |
| T2 hyperintensity                      |     |
| Present                                | Yes |
| Absent                                 | No  |
| Myocardial hemorrhage                  | No  |
| MVO                                    | Yes |
| Abnormal delayed enhancement           |     |
| Subendocardial                         | Yes |
| Transmural                             | Yes |
| Subendocardial + transmural            | Yes |
| LV dimensions and function             |     |
| LVEDV (ml/m <sup>2</sup> )             | 154 |
| LVESV (ml/m <sup>2</sup> )             | 63  |
| LVEF (%)                               | 59  |
| Pericardial effusion                   | No  |
| Definite diagnosis                     |     |
| MI                                     | Yes |
| Myocarditis                            | No  |
| Negative CMR                           | No  |

OCT – optical coherence tomography, CMR – cardiac magnetic resonance, MVO – microvascular obstruction, LV – left ventricle, MI – myocardial infarction.

Patient 9

| OCT                                    |     |
|----------------------------------------|-----|
| Plaque rupture                         | No  |
| Plaque erosion                         | No  |
| Eruptive calcific nodule               | No  |
| Spontaneous coronary artery dissection | No  |
| Presence of thrombus                   | No  |
| Negative OCT                           | Yes |
| CMR                                    |     |
| T2 hyperintensity                      |     |
| Present                                | Yes |
| Absent                                 | No  |
| Myocardial hemorrhage                  | No  |
| MVO                                    | No  |
| Abnormal delayed enhancement           |     |
| Subendocardial                         | No  |
| Transmural                             | No  |
| Subendocardial + transmural            | No  |
| LV dimensions and function             |     |
| LVEDV (ml/m <sup>2</sup> )             | 131 |
| LVESV (ml/m <sup>2</sup> )             | 63  |
| LVEF (%)                               | 52  |
| Pericardial effusion                   | Yes |
| Definite diagnosis                     |     |
| MI                                     | No  |
| Myocarditis                            | No  |
| Negative CMR                           | No  |

OCT – optical coherence tomography, CMR – cardiac magnetic resonance, MVO – microvascular obstruction, LV – left ventricle, MI – myocardial infarction.

Patient 10

| OCT                                    |     |
|----------------------------------------|-----|
| Plaque rupture                         | No  |
| Plaque erosion                         | No  |
| Eruptive calcific nodule               | No  |
| Spontaneous coronary artery dissection | No  |
| Presence of thrombus                   | Yes |
| Negative OCT                           | No  |
| CMR                                    |     |
| T2 hyperintensity                      |     |
| Present                                | Yes |
| Absent                                 | No  |
| Myocardial hemorrhage                  | No  |
| MVO                                    | No  |
| Abnormal delayed enhancement           |     |
| Subendocardial                         | No  |
| Transmural                             | Yes |
| Subendocardial + transmural            | No  |
| LV dimensions and function             |     |
| LVEDV (ml/m <sup>2</sup> )             | 100 |
| LVESV (ml/m <sup>2</sup> )             | 41  |
| LVEF (%)                               | 59  |
| Pericardial effusion                   | No  |
| Definite diagnosis                     |     |
| MI                                     | Yes |
| Myocarditis                            | No  |
| Negative CMR                           | No  |

OCT – optical coherence tomography, CMR – cardiac magnetic resonance, MVO – microvascular obstruction, LV – left ventricle, MI – myocardial infarction.
